# Supplementary material for: Quercetin protects porcine oocytes from in vitro aging by reducing oxidative stress and maintaining the mitochondrial functions
Source: Front Cell Dev Biol. 2022 Oct 5;10:915898. doi: 10.3389/fcell.2022.915898 (PMC9581393; doi:10.3389/fcell.2022.915898)
Supplement: Supplementary file 1 [file Table3.XLSX]

## Sheet: maturation rate
0 μM
0.7044	0.7125	0.7206
5 μM
0.7805	0.7606	0.7407
10 μM
0.848	0.837	0.826
20 μM
0.7722	0.7443	0.7164

## Sheet: cumulus expansion
Concentration (μM)	No. of oocytes	Grade 1	Grade 2	Grade 3	Mean ± SEM
		(1 scores)	(2 scores)	(3 scores)
0	112(37+34+41)	11（3+4+4）	26（7+8+11）	75	2.65
				（27+22+26）	2.53
					2.54
5	105（35+40+30）	10（3+3+4）	23	72	2.57
			(9+8+6)	(23+29+20)	2.65
					2.53
10	124(42+36+46)	11(3+3+5)	16(7+5+4)	97(32+28+37)	2.69
					2.69
					2.7
20	108(34+32+42)	11(3+3+5)	14(5+4+5)	83(26+25+32)	2.67
					2.69
					2.64

## Sheet: Aging rate
Fresh		Total
2/27	7.41%
2/30	0.0667	6/81
2/24	0.0833
Aged
8/26	0.3077
7/27	0.2593	21/78
6/25	0.24
Aged+QUE
3/23	0.1304
3/27	0.1111	9/75
3/25	0.12

## Sheet: apoptosis
Fresh	Total
6/43
7/54	159
7/62
Aged
21/32
32/42	121
35/47
Aged-QUE
24/54
35/72	190
34/64

## Sheet: spindle
Fresh
19/24	0.7917
12/16	0.75	total：58
13/18	0.7522
Aged
10/25	0.4
7/16	0.4375	tatol：63
8/22	0.3636
Aged-QUE
9/14	0.6429
12/20	0.6	tatol：49
8/15	0.5333
